# Supplementary material for: Long noncoding RNA and messenger RNA abnormalities in pediatric sepsis: a preliminary study
Source: PubMed Central journal article supplement (PMC7063742; doi:10.1186/s12920-020-0698-x), 2020-03-10
Supplement: 12920_2020_698_MOESM1_ESM.pdf [file 12920_2020_698_MOESM1_ESM.pdf]

| <b>Clinical parameters</b>     | <b>Control</b>        | <b>Sepsis</b>         | <b>P</b> |
|--------------------------------|-----------------------|-----------------------|----------|
| Hemoglobin, g/L                | 120 [116.3 - 128.5]   | 92.5 [79.3 - 105]     | < 0.001  |
| Platelet, 10 <sup>9</sup> /L # | 293.8 ± 22.8          | 196.2 ± 33.9          | 0.038    |
| Albumin, g/L #                 | 44.1 ± 0.6            | 35.1 ± 2.7            | 0.002    |
| Blood urea, mmol/L             | 3.9 [3.5 - 4.1]       | 3.2 [2.4 - 13.6]      | 0.759    |
| Creatinine, μmol/L             | 23 [20 - 24.7]        | 27.9 [22.5 - 72.7]    | 0.136    |
| CRP, mg/L                      | 0.2 [0.1 - 0.5]       | 104.9 [3.7 - 254.8]   | < 0.001  |
| LDH, U/L                       | 332.8 [272.5 - 368.6] | 530.5 [419.7 - 831.9] | < 0.001  |
| WBC, 10 <sup>9</sup> /L        | 8.6 [6.3 - 12]        | 5.2 [3.5 - 13.6]      | 0.314    |
| Neutrophil, 10 <sup>9</sup> /L | 2 [1.3 - 3]           | 2.9 [1.9 - 9.5]       | 0.159    |

# Data are presented as the mean ± standard error of mean.

CRP, C-reactive protein; LDH, lactate dehydrogenase; WBC, white blood cell.

Continuous variables were compared using Student's t-test or Mann-Whitney's *U* test, depending on the distribution, and were presented as the mean ± standard error of mean or median (interquartile range).
