# Supplementary material for: Long noncoding RNA and messenger RNA abnormalities in pediatric sepsis: a preliminary study
Source: PubMed Central journal article supplement (PMC7063742; doi:10.1186/s12920-020-0698-x), 2020-03-10
Supplement: 12920_2020_698_MOESM2_ESM.pdf [file 12920_2020_698_MOESM2_ESM.pdf]

| Gene name             | Forward and reverse primer                                   | T <sub>m</sub> (°C) | Product length (bp) |
|-----------------------|--------------------------------------------------------------|---------------------|---------------------|
| β-actin               | F:5'CATGTACGTTGCTATCCAGGC3'<br>R:5'CTCCTTAATGTCACGCACGAT3'   | 60                  | 249                 |
| HLX                   | F:5'ATCCCATTAACGAGGCTTCTG3'<br>R:5'CAGCATAGGGACCTGGAAAC3'    | 60                  | 102                 |
| DYSF                  | F:5'CTGGAGATTGGTTCGTGTGT3'<br>R:5'TCTGGTTCTCAAACACCTCTTC3'   | 60                  | 93                  |
| CXCR1                 | F:5'CGCCATGGATTCCCTCAAGAT3'<br>R:5'AGAGACATTGACAGACGAAGAAG3' | 60                  | 105                 |
| CLEC4D                | F:5'CCAGCTGATACCTTCGGTTATT3'<br>R:5'ACTCCTGTGCCTCTTTACA3'    | 60                  | 117                 |
| lnc-ZNF638-1          | F:5'TGCTCTGGGTGAAGTGTC3'<br>R:5'AGCCTCTATTCTTGAGGGTA3'       | 60                  | 76                  |
| lnc-TRAPPC5-1         | F:5'AGAGACAGTGAGGATGGTT3'<br>R:5'AAGAGGCAGCAAAGTGAC3'        | 60                  | 62                  |
| lnc-ANXA3-2           | F:5'CAGCCTTTAATGATGCCGT3'<br>R:5'TGTACTIONCATGGAGCGCAC3'     | 60                  | 74                  |
| lnc-RP11-1220K2.2.1-7 | F:5'AAACATCCATCTACATGCTGAG3'<br>R:5'CTTTACCCAGGTTCTGCTATGA3' | 60                  | 71                  |
